# Supplementary material
Source: HighWire-hosted journal article supplement (https://rmdopen.bmj.com/content/6/3/e001280)

**Supplementary Table 1** Numbers available for each of the analyses in Table 2 (Treatment effectiveness after 6 and 12 months of secukinumab treatment)

|                                                                                                                                             |           | All patients<br>(n=1860)  | b/tsDMARD naïve<br>patients (n=414) | 1 prior b/tsDMARD<br>(n=448) | 2 or more prior<br>b/tsDMARDs (n=998) | p-value*     |        |
|---------------------------------------------------------------------------------------------------------------------------------------------|-----------|---------------------------|-------------------------------------|------------------------------|---------------------------------------|--------------|--------|
| Secukinumab drug retention rate, %<br>(95%CI), n at risk                                                                                    | 6 months  | 82%<br>(80-84%)<br>n=1340 | 90%<br>(87-93%)<br>n=315            | 83%<br>(79-86%)<br>n=330     | 78%<br>(76-81%)<br>n=695              | 0.001        |        |
|                                                                                                                                             | 12 months | 72%<br>(69-74%)<br>n=795  | 84%<br>(81-88%)<br>n=166            | 73%<br>(69-78%)<br>n=193     | 66%<br>(63-69%)<br>n=436              | <0.001       |        |
| Median (95%CI) time in weeks to secukinumab withdrawal<br>due to loss of efficacy or adverse events before 12 months**,<br>n of withdrawals |           | 21 (20-22)<br>n=367       | 22 (16-28)<br>n=39                  | 21 (19-23)<br>n=84           | 21 (19-23)<br>n=244                   | 0.21         |        |
| BASDAI, median (IQR),<br>n available                                                                                                        | 6 months  | 3.9 (1.8-5.9)<br>n=1069   | 2.8 (1.4-4.1)<br>n=234              | 3.0 (1.5-5.7)<br>n=243       | 4.8 (2.7-6.6)<br>n=592                | <0.001       |        |
|                                                                                                                                             | 12 months | 3.9 (1.9-6.3)<br>n=660    | 2.4 (1.3-3.9)<br>n=140              | 3.2 (1.7-6.0)<br>n=149       | 5.0 (2.6-6.8)<br>n=371                | <0.001       |        |
| BASFI, median (IQR),<br>n available                                                                                                         | 6 months  | 3.9 (1.8-6.3)<br>n=765    | 2.4 (0.7-4.7)<br>n=148              | 4.0 (1.3-6.3)<br>n=147       | 4.4 (2.4-6.6)<br>n=470                | <0.001       |        |
|                                                                                                                                             | 12 months | 4.1 (1.8-6.5)<br>n=462    | 2.1 (0.5-4.3)<br>n=80               | 3.6 (1.4-6.4)<br>n=92        | 4.7 (2.7-6.7)<br>n=290                | <0.001       |        |
| ASDAS, median (IQR),<br>n available                                                                                                         | 6 months  | 2.6 (1.9-3.3)<br>n=925    | 2.2 (1.7-2.7)<br>n=197              | 2.4 (1.7-3.1)<br>n=209       | 2.8 (2.1-3.6)<br>n=519                | <0.001       |        |
|                                                                                                                                             | 12 months | 2.5 (1.8-3.4)<br>n=531    | 1.9 (1.5-2.6)<br>n=102              | 2.3 (1.6-3.2)<br>n=117       | 2.8 (2.0-3.5)<br>n=312                | <0.001       |        |
| BASDAI <2, %,<br>n available                                                                                                                | 6 months  | Crude                     | 26%<br>n=1069                       | 37%<br>n=234                 | 35%<br>n=243                          | 18%<br>n=592 | <0.001 |
|                                                                                                                                             |           | LUNDEX<br>adjusted**      | 21%<br>n=1069                       | 34%<br>n=234                 | 28%<br>n=243                          | 13%<br>n=592 | <0.001 |
|                                                                                                                                             | 12 months | Crude                     | 25%<br>n=660                        | 41%<br>n=140                 | 29%<br>n=149                          | 18%<br>n=371 | <0.001 |
|                                                                                                                                             |           | LUNDEX<br>adjusted**      | 16%<br>n=660                        | 31%<br>n=140                 | 18%<br>n=149                          | 11%<br>n=371 | <0.001 |

|                                                                 |                     |                            |                            |                            |                           |              |        |
|-----------------------------------------------------------------|---------------------|----------------------------|----------------------------|----------------------------|---------------------------|--------------|--------|
| <b>BASDAI &lt;4, %, n available</b>                             | <b>6 months</b>     | <b>Crude</b>               | 51%<br>n=1069              | 71%<br>n=234               | 60%<br>n=243              | 40%<br>n=592 | <0.001 |
|                                                                 |                     | <b>LUNDEX adjusted**</b>   | 40%<br>n=1069              | 65%<br>n=234               | 47%<br>n=243              | 30%<br>n=592 | <0.001 |
|                                                                 | <b>12 months</b>    | <b>Crude</b>               | 51%<br>n=660               | 76%<br>n=140               | 56%<br>n=149              | 39%<br>n=371 | <0.001 |
|                                                                 |                     | <b>LUNDEX adjusted**</b>   | 32%<br>n=660               | 57%<br>n=140               | 36%<br>n=149              | 23%<br>n=371 | <0.001 |
| <b>ASDAS &lt;1.3, %, n available</b>                            | <b>6 months</b>     | <b>Crude</b>               | 9%<br>n=925                | 13%<br>n=197               | 13%<br>n=209              | 6%<br>n=519  | 0.001  |
|                                                                 |                     | <b>LUNDEX adjusted**</b>   | 7%<br>n=925                | 12%<br>n=197               | 11%<br>n=209              | 5%<br>n=519  | <0.001 |
|                                                                 | <b>12 months</b>    | <b>Crude</b>               | 11%<br>n=531               | 18%<br>n=102               | 15%<br>n=117              | 7%<br>n=312  | 0.002  |
|                                                                 |                     | <b>LUNDEX adjusted**</b>   | 7%<br>n=531                | 13%<br>n=102               | 9%<br>n=117               | 4%<br>n=312  | 0.002  |
| <b>ASDAS &lt;2.1, %, n available</b>                            | <b>6 months</b>     | <b>Crude</b>               | 24%<br>n=925               | 32%<br>n=197               | 26%<br>n=209              | 20%<br>n=519 | 0.002  |
|                                                                 |                     | <b>LUNDEX adjusted**</b>   | 19%<br>n=925               | 29%<br>n=197               | 21%<br>n=209              | 15%<br>n=519 | <0.001 |
|                                                                 | <b>12 months</b>    | <b>Crude</b>               | 27%<br>n=531               | 44%<br>n=102               | 27%<br>n=117              | 21%<br>n=312 | <0.001 |
|                                                                 |                     | <b>LUNDEX adjusted**</b>   | 17%<br>n=531               | 33%<br>n=102               | 17%<br>n=117              | 12%<br>n=312 | <0.001 |
| <b>Change in BASDAI from baseline to 6 months, n available</b>  | <b>Mean (SD)</b>    | -2.1 (2.6)<br>n=893        | -3.7 (2.5)<br>n=220        | -2.1 (2.5)<br>n=203        | -1.4 (2.3)<br>n=470       | <0.001       |        |
|                                                                 | <b>Median (IQR)</b> | -1.9 (-3.9, -0.2)<br>n=893 | -3.9 (-5.4, -2.0)<br>n=220 | -1.9 (-3.8, -0.1)<br>n=203 | -1.0 (-2.8, 0.1)<br>n=470 | <0.001       |        |
| <b>Change in BASDAI from baseline to 12 months, n available</b> | <b>Mean (SD)</b>    | -2.1 (2.5)<br>n=514        | -3.3 (2.6)<br>n=129        | -2.1 (2.3)<br>n=118        | -1.4 (2.4)<br>n=267       | <0.001       |        |
|                                                                 | <b>Median (IQR)</b> | -1.6 (-3.7, -0.2)<br>n=514 | -3.4 (-5.4, -1.2)<br>n=129 | -1.9 (-3.6, -0.5)<br>n=118 | -1.1 (-2.5, 0.0)<br>n=267 | <0.001       |        |
| <b>Change in ASDAS from baseline to 6 months, n available</b>   | <b>Mean (SD)</b>    | -1.1 (1.3)<br>n=753        | -2.0 (1.1)<br>n=184        | -1.1 (1.3)<br>n=172        | -0.7 (1.2)<br>n=397       | <0.001       |        |

|                                                                |                  |                          |                            |                            |                            |                            |        |
|----------------------------------------------------------------|------------------|--------------------------|----------------------------|----------------------------|----------------------------|----------------------------|--------|
|                                                                |                  | <b>Median (IQR)</b>      | -1.1 (-2.0, -0.2)<br>n=753 | -1.9 (-2.9, -1.2)<br>n=184 | -1.1 (-2.0, -0.1)<br>n=172 | -0.6 (-1.6, 0.0)<br>n=397  | <0.001 |
| <b>Change in ASDAS from baseline to 12 months, n available</b> |                  | <b>Mean (SD)</b>         | -1.1 (1.3)<br>n=396        | -2.0 (1.3)<br>n=83         | -1.2 (1.2)<br>n=88         | -0.7 (1.2)<br>n=225        | <0.001 |
|                                                                |                  | <b>Median (IQR)</b>      | -0.9 (-2.0, -0.1)<br>n=396 | -2.0 (-3.1, -1.0)<br>n=83  | -1.2 (-2.2, -0.3)<br>n=88  | -0.5 (-1.5, -0.1)<br>n=225 | <0.001 |
| <b>BASDAI50 response, %</b>                                    | <b>6 months</b>  | <b>Crude</b>             | 53%<br>n=893               | 79%<br>n=220               | 53%<br>n=203               | 40%<br>n=470               | <0.001 |
|                                                                |                  | <b>LUNDEX adjusted**</b> | 42%<br>n=893               | 72%<br>n=220               | 42%<br>n=203               | 30%<br>n=470               | <0.001 |
|                                                                | <b>12 months</b> | <b>Crude</b>             | 47%<br>n=514               | 67%<br>n=129               | 53%<br>n=118               | 36%<br>n=267               | <0.001 |
|                                                                |                  | <b>LUNDEX adjusted**</b> | 29%<br>n=514               | 51%<br>n=129               | 34%<br>n=118               | 21%<br>n=267               | <0.001 |
| <b>ASAS20 response, %</b>                                      | <b>6 months</b>  | <b>Crude</b>             | 40%<br>n=522               | 66%<br>n=107               | 41%<br>n=91                | 32%<br>n=324               | <0.001 |
|                                                                |                  | <b>LUNDEX adjusted**</b> | 32%<br>n=522               | 60%<br>n=107               | 32%<br>n=91                | 24%<br>n=324               | <0.001 |
|                                                                | <b>12 months</b> | <b>Crude</b>             | 37%<br>n=281               | 69%<br>n=51                | 35%<br>n=52                | 29%<br>n=178               | <0.001 |
|                                                                |                  | <b>LUNDEX adjusted**</b> | 23%<br>n=281               | 52%<br>n=51                | 22%<br>n=52                | 17%<br>n=178               | <0.001 |
| <b>ASAS40 response, %</b>                                      | <b>6 months</b>  | <b>Crude</b>             | 28%<br>n=522               | 57%<br>n=107               | 23%<br>n=91                | 19%<br>n=324               | <0.001 |
|                                                                |                  | <b>LUNDEX adjusted**</b> | 22%<br>n=522               | 52%<br>n=107               | 18%<br>n=91                | 14%<br>n=324               | <0.001 |
|                                                                | <b>12 months</b> | <b>Crude</b>             | 22%<br>n=281               | 55%<br>n=51                | 19%<br>n=52                | 14%<br>n=178               | <0.001 |
|                                                                |                  | <b>LUNDEX adjusted**</b> | 14%<br>n=281               | 42%<br>n=51                | 12%<br>n=52                | 8%<br>n=178                | <0.001 |
| <b>ASDAS CII, %</b>                                            | <b>6 months</b>  | <b>Crude</b>             | 49%<br>n=753               | 77%<br>n=184               | 52%<br>n=172               | 35%<br>n=397               | <0.001 |
|                                                                |                  | <b>LUNDEX adjusted**</b> | 39%<br>n=753               | 70%<br>n=184               | 41%<br>n=172               | 26%<br>n=397               | <0.001 |

|             |           |                      |              |              |              |              |        |
|-------------|-----------|----------------------|--------------|--------------|--------------|--------------|--------|
|             | 12 months | Crude                | 46%<br>n=396 | 72%<br>n=83  | 52%<br>n=88  | 33%<br>n=225 | <0.001 |
|             |           | LUNDEX<br>adjusted** | 29%<br>n=396 | 55%<br>n=83  | 33%<br>n=88  | 19%<br>n=225 | <0.001 |
| ASDAS MI, % | 6 months  | Crude                | 25%<br>n=753 | 46%<br>n=184 | 25%<br>n=172 | 15%<br>n=397 | <0.001 |
|             |           | LUNDEX<br>adjusted** | 20%<br>n=753 | 42%<br>n=184 | 20%<br>n=172 | 11%<br>n=397 | <0.001 |
|             | 12 months | Crude                | 26%<br>n=396 | 51%<br>n=83  | 27%<br>n=88  | 17%<br>n=225 | <0.001 |
|             |           | LUNDEX<br>adjusted** | 16%<br>n=396 | 39%<br>n=83  | 17%<br>n=88  | 10%<br>n=225 | <0.001 |

\*Drug retention rates were compared by Kaplan-Meier with log-rank test, continuous measures by ANOVA or Kruskal-Wallis, as appropriate, and proportions by Chi-Square test. \*\*Patients with at least 6/12 months from secukinumab start to date of data cut, as appropriate; ASDAS, Ankylosing Spondylitis Disease Activity Score; ASAS20/40, Assessment of Spondyloarthritis International Society 20/40 response, ASDAS CII, ASDAS Clinically Important Improvement ( $\geq 1.1$ ); ASDAS MI, ASDAS Major Improvement ( $\geq 2.0$ ); BASDAI, Bath Ankylosing Spondylitis Disease Activity Index; BASDAI50, at least 50% improvement in BASDAI score or an absolute change of 2 (on a 0-10 scale); BASFI, Bath Ankylosing Spondylitis Functional Index.

**Supplementary Table 2** Numbers available for each of the analyses in Table 3 (Retention, inactive disease, LDA and response rates after 6 and 12 months of secukinumab treatment stratified across European registries (ICEBIO (Iceland) is excluded from the table due to <10 patients at secukinumab initiation))

|                                             | Months                          | ARTIS<br>n=449           | RRBR<br>n=301            | SCQM<br>n=227            | ATTRA<br>n=213           | DANBIO<br>n=151         | BIOBAD<br>ASER<br>n=132 | TURKBIO<br>n=96         | NOR-<br>DMARD<br>n=71   | biorx.si<br>n=64        | Reuma.pt<br>n=57         | GISEA<br>n=48           | ROB-FIN<br>n=43         | p-value* |
|---------------------------------------------|---------------------------------|--------------------------|--------------------------|--------------------------|--------------------------|-------------------------|-------------------------|-------------------------|-------------------------|-------------------------|--------------------------|-------------------------|-------------------------|----------|
| <b>Retention rate, % (95%CI), n at risk</b> | <b>6</b><br>n=1334 <sup>§</sup> | 78%<br>(74-82%)<br>n=318 | 89%<br>(86-93%)<br>n=236 | 77%<br>(71-83%)<br>n=169 | 88%<br>(84-93%)<br>n=154 | 73%<br>(67-81%)<br>n=94 | 82%<br>(75-89%)<br>n=90 | 82%<br>(75-91%)<br>n=59 | 76%<br>(66-87%)<br>n=43 | 87%<br>(80-96%)<br>n=57 | 93%<br>(86-100%)<br>n=48 | 89%<br>(80-99%)<br>n=36 | 70%<br>(57-85%)<br>n=30 | <0.001   |
|                                             | <b>12</b><br>n=792 <sup>§</sup> | 64%<br>(59-69%)<br>n=212 | 85%<br>(81-90%)<br>n=117 | 64%<br>(58-71%)<br>n=115 | 84%<br>(79-90%)<br>n=86  | 64%<br>(56-73%)<br>n=57 | 75%<br>(67-83%)<br>n=58 | <10<br>patients         | 56%<br>(43-71%)<br>n=20 | 83%<br>(74-93%)<br>n=52 | 86%<br>(77-96%)<br>n=29  | 86%<br>(77-97%)<br>n=23 | 53%<br>(40-71%)<br>n=23 | <0.001   |
| <b>BASDAI&lt;2, %</b>                       | <b>6</b><br>n=1069              | 10%<br>n=255             | 56%<br>n=199             | 17%<br>n=89              | 35%<br>n=147             | 11%<br>n=111            | 0%<br>n=13              | 42%<br>n=73             | 12%<br>n=33             | 25%<br>n=48             | 11%<br>n=47              | 9%<br>n=22              | 25%<br>n=28             | <0.001   |
|                                             | <b>12</b><br>n=660              | 9%<br>n=156              | 71%<br>n=94              | 9%<br>n=81               | 44%<br>n=62              | 15%<br>n=80             | 20%<br>n=49             | <10<br>patients         | 7%<br>n=15              | 17%<br>n=46             | 21%<br>n=29              | 19%<br>n=16             | 33%<br>n=21             | <0.001   |
| <b>BASDAI&lt;4, %</b>                       | <b>6</b><br>n=1069              | 31%<br>n=255             | 89%<br>n=199             | 34%<br>n=89              | 67%<br>n=147             | 26%<br>n=111            | 38%<br>n=13             | 64%<br>n=73             | 45%<br>n=33             | 54%<br>n=48             | 36%<br>n=47              | 46%<br>n=22             | 43%<br>n=28             | <0.001   |
|                                             | <b>12</b><br>n=660              | 31%<br>n=156             | 96%<br>n=94              | 35%<br>n=81              | 73%<br>n=62              | 36%<br>n=80             | 47%<br>n=49             | <10<br>patients         | 33%<br>n=15             | 46%<br>n=46             | 59%<br>n=29              | 63%<br>n=16             | 62%<br>n=21             | <0.001   |
| <b>ASDAS&lt;1.3, %</b>                      | <b>6</b><br>n=925               | 7%<br>n=237              | 13%<br>n=199             | 8%<br>n=67               | 9%<br>n=142              | 4%<br>n=90              | <10<br>patients         | 18%<br>n=67             | 7%<br>n=30              | 0%<br>n=11              | 5%<br>n=44               | 13%<br>n=23             | 8%<br>n=12              | 0.09     |
|                                             | <b>12</b><br>n=531              | 5%<br>n=148              | 15%<br>n=94              | 8%<br>n=67               | 20%<br>n=61              | 12%<br>n=64             | 14%<br>n=14             | <10<br>patients         | 0%<br>n=14              | 0%<br>n=10              | 8%<br>n=26               | 23%<br>n=13             | 10%<br>n=10             | 0.11     |
| <b>ASDAS&lt;2.1, %</b>                      | <b>6</b><br>n=925               | 15%<br>n=237             | 35%<br>n=199             | 18%<br>n=67              | 32%<br>n=142             | 16%<br>n=90             | <10<br>patients         | 25%<br>n=67             | 27%<br>n=30             | 27%<br>n=11             | 11%<br>n=44              | 35%<br>n=23             | 25%<br>n=12             | <0.001   |
|                                             | <b>12</b><br>n=531              | 18%<br>n=148             | 52%<br>n=94              | 19%<br>n=67              | 31%<br>n=61              | 19%<br>n=64             | 57%<br>n=14             | <10<br>patients         | 7%<br>n=14              | 10%<br>n=10             | 27%<br>n=26              | 23%<br>n=13             | 20%<br>n=10             | <0.001   |
| <b>BASDAI50 response, %</b>                 | <b>6</b><br>n=893               | 34%<br>n=182             | 86%<br>n=199             | 29%<br>n=41              | 68%<br>n=147             | 28%<br>n=106            | 33%<br>n=12             | 52%<br>n=66             | 36%<br>n=31             | 57%<br>n=23             | 53%<br>n=38              | 28%<br>n=18             | 32%<br>n=28             | <0.001   |
|                                             | <b>12</b><br>n=514              | 21%<br>n=102             | 92%<br>n=94              | 24%<br>n=45              | 68%<br>n=62              | 29%<br>n=73             | 50%<br>n=48             | <10<br>patients         | 13%<br>n=15             | 72%<br>n=18             | 53%<br>n=19              | 31%<br>n=13             | 37%<br>n=19             | <0.001   |
| <b>ASAS20 response, %</b>                   | <b>6</b><br>n=522               | 31%<br>n=167             | -                        | 30%<br>n=33              | 63%<br>n=146             | 27%<br>n=106            | -                       | 46%<br>n=63             | -                       | <10<br>patients         | -                        | -                       | <10<br>patients         | <0.001   |
|                                             | <b>12</b><br>n=281              | 18%<br>n=98              | -                        | 31%<br>n=39              | 74%<br>n=62              | 36%<br>n=73             | -                       | <10<br>patients         | -                       | <10<br>patients         | -                        | -                       | <10<br>patients         | <0.001   |
| <b>ASAS40 response, %</b>                   | <b>6</b><br>n=522               | 18%<br>n=167             | -                        | 24%<br>n=33              | 52%<br>n=146             | 12%<br>n=106            | -                       | 29%<br>n=63             | -                       | <10<br>patients         | -                        | -                       | <10<br>patients         | <0.001   |
|                                             | <b>12</b><br>n=281              | 7%<br>n=98               | -                        | 15%<br>n=39              | 55%<br>n=62              | 21%<br>n=73             | -                       | <10<br>patients         | -                       | <10<br>patients         | -                        | -                       | <10<br>patients         | <0.001   |

\* Comparisons across the registries were performed with Kaplan-Meier with log rank test for retention rates and Chi-Square test for disease states and response rates. <sup>§</sup> n at risk at 6 months including

ICEBIO is 1340 and at 12 months including ICEBIO and TURKBIO 795; - not collected; ASDAS, Ankylosing Spondylitis Disease Activity Score; ASAS20/40, Assessment of Spondyloarthritis International Society 20/40 response; ASDAS CII, ASDAS Clinically Important Improvement ( $\geq 1.1$ ); ASDAS MI, ASDAS Major Improvement ( $\geq 2.0$ ); BASDAI, Bath Ankylosing Spondylitis Disease Activity Index; BASDAI50, at least 50% improvement in BASDAI score or an absolute change of 2 (on a 0-10 scale); BASFI, Bath Ankylosing Spondylitis Functional Index

**Supplementary Table 3** Comparison of secukinumab effectiveness across time since diagnosis

|                                                                             |           | Time since diagnosis<br><2 years (n=197) | Time since diagnosis 2-4 years<br>(n=353) | Time since diagnosis >4 years<br>(n=1010) | p-value* |
|-----------------------------------------------------------------------------|-----------|------------------------------------------|-------------------------------------------|-------------------------------------------|----------|
| Secukinumab retention rate, %<br>(95%CI)<br><i>n at risk at 6/12 months</i> | 6 months  | 83% (78-89%)<br>n=148                    | 82% (78-86%)<br>n=255                     | 83% (80-85%)<br>n=732                     | 0.96     |
|                                                                             | 12 months | 73% (66%-80%)<br>n=84                    | 73% (68-78%)<br>n=147                     | 73% (70-76%)<br>n=430                     | 0.94     |
| BASDAI <2, %, n available                                                   | 6 months  | 32%<br>n=113                             | 20%<br>n=206                              | 32%<br>n=582                              | 0.005    |
|                                                                             | 12 months | 27%<br>n=79                              | 23%<br>n=125                              | 29%<br>n=361                              | 0.44     |
| BASDAI <4, %, n available                                                   | 6 months  | 65%<br>n=113                             | 46%<br>n=206                              | 56%<br>n=582                              | 0.004    |
|                                                                             | 12 months | 58%<br>n=79                              | 46%<br>n=125                              | 56%<br>n=361                              | 0.12     |
| ASDAS<1.3, %, n available                                                   | 6 months  | 14%<br>n=96                              | 9%<br>n=176                               | 11%<br>n=498                              | 0.43     |
|                                                                             | 12 months | 16%<br>n=62                              | 10%<br>n=99                               | 11%<br>n=280                              | 0.49     |
| ASDAS<2.1, %, n available                                                   | 6 months  | 26%<br>n=96                              | 21%<br>n=176                              | 27%<br>n=498                              | 0.42     |
|                                                                             | 12 months | 23%<br>n=62                              | 24%<br>n=99                               | 32%<br>n=280                              | 0.18     |
| BASDAI50, %, n available                                                    | 6 months  | 66%<br>n=101                             | 55%<br>n=166                              | 54%<br>n=499                              | 0.06     |
|                                                                             | 12 months | 56%<br>n=63                              | 44%<br>n=100                              | 53%<br>n=286                              | 0.24     |
| ASAS20, %, n available                                                      | 6 months  | 51%<br>n=55                              | 40%<br>n=98                               | 43%<br>n=262                              | 0.41     |
|                                                                             | 12 months | 42%<br>n=36                              | 35%<br>n=60                               | 47%<br>n=127                              | 0.33     |
| ASAS40, %, n available                                                      | 6 months  | 38%<br>n=55                              | 30%<br>n=98                               | 30%<br>n=79                               | 0.47     |
|                                                                             | 12 months | 25%<br>n=36                              | 17%<br>n=60                               | 30%<br>n=127                              | 0.15     |
| ASDAS CII, %, n available                                                   | 6 months  | 60%<br>n=83                              | 50%<br>n=143                              | 52%<br>n=422                              | 0.32     |

|                                 |                  |             |              |              |      |
|---------------------------------|------------------|-------------|--------------|--------------|------|
|                                 | <b>12 months</b> | 48%<br>n=46 | 44%<br>n=73  | 52%<br>n=223 | 0.46 |
| <b>ASDAS MI, %, n available</b> | <b>6 months</b>  | 34%<br>n=83 | 27%<br>n=143 | 26%<br>n=422 | 0.36 |
|                                 | <b>12 months</b> | 33%<br>n=46 | 27%<br>n=73  | 29%<br>n=223 | 0.82 |

\*Drug retention rates were compared with Kaplan-Meier with log-rank test, continuous measures by ANOVA or Kruskal-Wallis, as appropriate, and proportions by Chi-Square test. ASDAS, Ankylosing Spondylitis Disease Activity Score; ASAS20/40, Assessment of Spondyloarthritis International Society 20/40 response; ASDAS CII, ASDAS Clinically Important Improvement ( $\geq 1.1$ ); ASDAS MI, ASDAS Major Improvement ( $\geq 2.0$ ); BASDAI, Bath Ankylosing Spondylitis Disease Activity Index; BASDAI50, at least 50% improvement in BASDAI score or an absolute change of 2 (on a 0-10 scale); BASFI, Bath Ankylosing Spondylitis Functional Index. 300 patients had missing values for time since diagnosis.



**Supplementary Table 4** Heterogeneity in baseline characteristics and disease activity across the European registries

|                                                                | ARTIS<br>n=449      | RRBR<br>n=301       | SCQM<br>n=227       | ATTRA<br>n=213      | DANBIO<br>n=151     | BIO<br>BADASER<br>n=132 | TURKBIO<br>n=96    | NOR-<br>DMARD<br>n=71 | biorex.si<br>n=64  | Reuma.pt<br>n=57   | GISEA<br>n=48      | ROB-FIN<br>n=43    | ICEBIO<br>n=8   | p-value |
|----------------------------------------------------------------|---------------------|---------------------|---------------------|---------------------|---------------------|-------------------------|--------------------|-----------------------|--------------------|--------------------|--------------------|--------------------|-----------------|---------|
| Age (years),<br>mean (SD),<br>n available                      | 48 (13)<br>n=449    | 48 (11)<br>n=301    | 47 (11)<br>n=227    | 44 (11)<br>n=213    | 46 (12)<br>n=151    | 50 (11)<br>n=132        | 43 (11)<br>n=96    | 48 (10)<br>n=71       | 49 (13)<br>n=64    | 46 (12)<br>n=57    | 50 (13)<br>n=48    | 47 (13)<br>n=43    | <10<br>patients | <0.001  |
| Men, %<br>n available                                          | 42%<br>n=449        | 73%<br>n=301        | 39%<br>n=227        | 70%<br>n=213        | 52%<br>n=151        | 71%<br>n=132            | 53%<br>n=96        | 44%<br>n=71           | 61%<br>n=64        | 60%<br>n=57        | 65%<br>n=48        | 51%<br>n=43        | <10<br>patients | <0.001  |
| Years since<br>diagnosis, mean<br>(SD), n available            | 7 (9)<br>n=212      | 11 (9)<br>n=301     | 9 (8)<br>n=227      | 10 (8)<br>n=212     | 8 (8)<br>n=144      | 13 (10)<br>n=132        | 9 (7)<br>n=83      | 15 (11)<br>n=48       | 11 (11)<br>n=63    | 12 (10)<br>n=48    | 9 (7)<br>n=44      | 10 (10)<br>n=40    | <10<br>patients | <0.001  |
| Current<br>smokers, %, n<br>available                          | 13%<br>n=449        | 11%<br>n=301        | 33%<br>n=179        | 42%<br>n=184        | 30%<br>n=150        | 43%<br>n=121            | 42%<br>n=81        | 13%<br>n=55           | 29%<br>n=63        | 33%<br>n=46        | 44%<br>n=27        | 26%<br>n=35        | <10<br>patients | <0.001  |
| Patient's global<br>(0-100), median<br>(IQR), n<br>available   | 69 (53-82)<br>n=327 | 70 (50-80)<br>n=301 | 65 (50-80)<br>n=100 | 70 (50-80)<br>n=213 | 80 (60-92)<br>n=141 | 70 (30-80)<br>n=11      | 60 (44-80)<br>n=84 | 75 (51-88)<br>n=63    | 80 (50-80)<br>n=11 | 77 (65-90)<br>n=42 | <10<br>patients    | 41 (16-74)<br>n=25 | <10<br>patients | <0.001  |
| Physician's<br>global (0-100),<br>median (IQR),<br>n available | 40 (25-50)<br>n=156 | <10<br>patients     | 50 (30-60)<br>n=127 | 70 (56-80)<br>n=206 | 18 (10-35)<br>n=90  | <10<br>patients         | 30 (12-40)<br>n=85 | 40 (23-50)<br>n=39    | 50 (0-70)<br>n=11  | 57 (40-80)<br>n=34 | <10<br>patients    | 40 (17-50)<br>n=27 | <10<br>patients | <0.001  |
| HAQ (0-3),<br>mean (SD),<br>n available                        | 1.0 (0.6)<br>n=222  | 1.6 (0.5)<br>n=42   | <10<br>patients     | 1.3 (0.6)<br>n=213  | 1.1 (0.6)<br>n=140  | <10<br>patients         | 0.9 (0.6)<br>n=83  | 0.8 (0.5)<br>n=63     | 1.2 (0.6)<br>n=34  | <10<br>patients    | 1.1 (0.7)<br>n=37  | <10<br>patients    | <10<br>patients | <0.001  |
| BMI (kg/m <sup>2</sup> ),<br>median (IQR),<br>n available      | <10<br>patients     | 27 (24-32)<br>n=301 | 27 (20-31)<br>n=162 | 26 (23-30)<br>n=180 | 26 (22-30)<br>n=78  | 28 (24-31)<br>n=109     | 27 (25-30)<br>n=70 | <10<br>patients       | 27 (23-31)<br>n=62 | 25 (22-29)<br>n=20 | 29 (25-30)<br>n=31 | 27 (24-32)<br>n=42 | <10<br>patients | 0.35    |
| CRP (mg/L),<br>median (IQR),<br>n available                    | 4 (1-11)<br>n=337   | 23 (10-45)<br>n=301 | 5 (2-10)<br>n=127   | 18 (8-34)<br>n=206  | 6 (2-16)<br>n=124   | 2 (0-9)<br>n=46         | 9 (3-25)<br>n=86   | 3 (2-11)<br>n=66      | 20 (5-43)<br>n=36  | 16 (9-43)<br>n=41  | 3 (2-9)<br>n=46    | 4 (2-8)<br>n=31    | <10<br>patients | <0.001  |
| ESR (mm/h),<br>median (IQR),<br>n available                    | 12 (6-27)<br>n=302  | 43 (27-63)<br>n=301 | 10 (4-25)<br>n=114  | 28 (14-44)<br>n=196 | -                   | 17 (6-37)<br>n=42       | -                  | 15 (5-27)<br>n=48     | 28 (16-45)<br>n=36 | 24 (10-47)<br>n=42 | 15 (7-21)<br>n=31  | 9 (2-17)<br>n=31   | -               | <0.001  |
| Pain (0-100),<br>median (IQR),<br>n available                  | 69 (54-82)<br>n=325 | 80 (60-90)<br>n=301 | 70 (50-80)<br>n=99  | 70 (55-80)<br>n=213 | 73 (55-86)<br>n=141 | -                       | 60 (40-77)<br>n=84 | 64 (49-80)<br>n=62    | 70 (58-80)<br>n=34 | -                  | -                  | 47 (25-69)<br>n=35 | <10<br>patients | <0.001  |

|                                                                                                                                                                                                                                                                                                                                                                                                                                                                                                                                                                                                 |                     |                     |                    |                     |                     |                     |                    |                    |                    |                    |                    |                    |              |        |
|-------------------------------------------------------------------------------------------------------------------------------------------------------------------------------------------------------------------------------------------------------------------------------------------------------------------------------------------------------------------------------------------------------------------------------------------------------------------------------------------------------------------------------------------------------------------------------------------------|---------------------|---------------------|--------------------|---------------------|---------------------|---------------------|--------------------|--------------------|--------------------|--------------------|--------------------|--------------------|--------------|--------|
| <b>Fatigue (0-100), median (IQR), n available</b>                                                                                                                                                                                                                                                                                                                                                                                                                                                                                                                                               | 74 (57-87) n=318    | 70 (50-80) n=301    | 70 (53-80) n=96    | 70 (55-80) n=213    | 81 (56-92) n=141    | -                   | 50 (30-70) n=83    | 70 (50-80) n=33    | -                  | -                  | -                  | -                  | <10 patients | <0.001 |
| <b>BASDAI, median (IQR), n available</b>                                                                                                                                                                                                                                                                                                                                                                                                                                                                                                                                                        | 6.5 (5.1-8.0) n=266 | 6.4 (4.4-7.6) n=301 | 6.1 (4.8-7.3) n=94 | 6.2 (5.2-7.9) n=213 | 6.7 (5.0-8.0) n=139 | 6.2 (4.7-7.6) n=130 | 3.9 (2.8-5.8) n=87 | 6.1 (4.6-7.6) n=64 | 5.9 (5.0-6.9) n=25 | 6.9 (5.5-8.0) n=44 | 5.0 (3.0-6.0) n=37 | 4.2 (1.9-6.7) n=39 | <10 patients | <0.001 |
| <b>BASFI, median (IQR), n available</b>                                                                                                                                                                                                                                                                                                                                                                                                                                                                                                                                                         | 5.4 (3.3-7.1) n=256 | -                   | 4.7 (2.2-6.5) n=91 | 6.2 (3.6-7.6) n=213 | 6.3 (3.8-7.7) n=139 | -                   | 3.6 (1.7-6.2) n=87 | -                  | 5.5 (3.5-7.9) n=25 | 6.7 (5.7-8.0) n=38 | 5.0 (2.0-6.0) n=10 | <10 patients       | <10 patients | <0.001 |
| <b>ASDAS, median (IQR), n available</b>                                                                                                                                                                                                                                                                                                                                                                                                                                                                                                                                                         | 3.2 (2.7-4.1) n=252 | 4.2 (3.5-4.8) n=301 | 3.1 (2.7-4.0) n=87 | 4.0 (3.3-4.7) n=206 | 3.6 (2.9-4.2) n=120 | 3.6 (2.8-4.1) n=32  | 3.2 (2.5-3.9) n=83 | 3.5 (2.7-3.8) n=58 | <10 patients       | 3.9 (3.2-4.7) n=40 | 2.7 (2.2-3.3) n=36 | 3.0 (1.0-4.1) n=15 | <10 patients | <0.001 |
| <b>b/tsDMARD naive patients, %, n available</b>                                                                                                                                                                                                                                                                                                                                                                                                                                                                                                                                                 | 7% n=449            | 33% n=301           | 9% n=227           | 55% n=213           | 5% n=151            | 48% n=132           | 21% n=96           | 3% n=71            | 22% n=64           | 25% n=57           | 31% n=48           | 16% n=43           | <10 patients | <0.001 |
| -, not collected; *Comparisons between the registries were performed with Chi-Square test, ANOVA or Kruskal-Wallis, as appropriate. BMI, body mass index (kg/m <sup>2</sup> ); ASDAS, Ankylosing Spondylitis Disease Activity Score; BASDAI, Bath Ankylosing Spondylitis Disease Activity Index; BASFI, Bath Ankylosing Spondylitis Functional Index; CRP, C-reactive protein (mg/L); csDMARD, conventional synthetic Disease Modifying Anti-Rheumatic Drug; ESR, erythrocyte sedimentation rate (mm/h); HAQ, Health Assessment Questionnaire; IQR, interquartile range; SD, standard deviation |                     |                     |                    |                     |                     |                     |                    |                    |                    |                    |                    |                    |              |        |

**Supplementary table 5** Response rates in patients previously treated with  $\geq 3$  b/tsDMARDs

| <b>Patients previously treated with <math>\geq 3</math> b/tsDMARDs</b> |                  |     |
|------------------------------------------------------------------------|------------------|-----|
| <b>BASDAI50 response</b>                                               | 6 months, n=256  | 38% |
|                                                                        | 12 months, n=146 | 30% |
| <b>ASAS20 response</b>                                                 | 6 months, n=197  | 31% |
|                                                                        | 12 months, n=115 | 33% |
| <b>ASAS40 response</b>                                                 | 6 months, n=197  | 18% |
|                                                                        | 12 months, n=115 | 16% |
| <b>ASDAS CII</b>                                                       | 6 months, n=218  | 33% |
|                                                                        | 12 months, n=127 | 29% |
| <b>ASDAS MI</b>                                                        | 6 months, n=218  | 12% |
|                                                                        | 12 months, n=127 | 16% |

**Supplementary Figure 1** Pooled 12-month secukinumab retention probabilities adjusted for age, time since diagnosis and gender, stratified by previous b/tsDMARD treatment (Cox Proportional Hazards model ,  $p < 0.001$ )

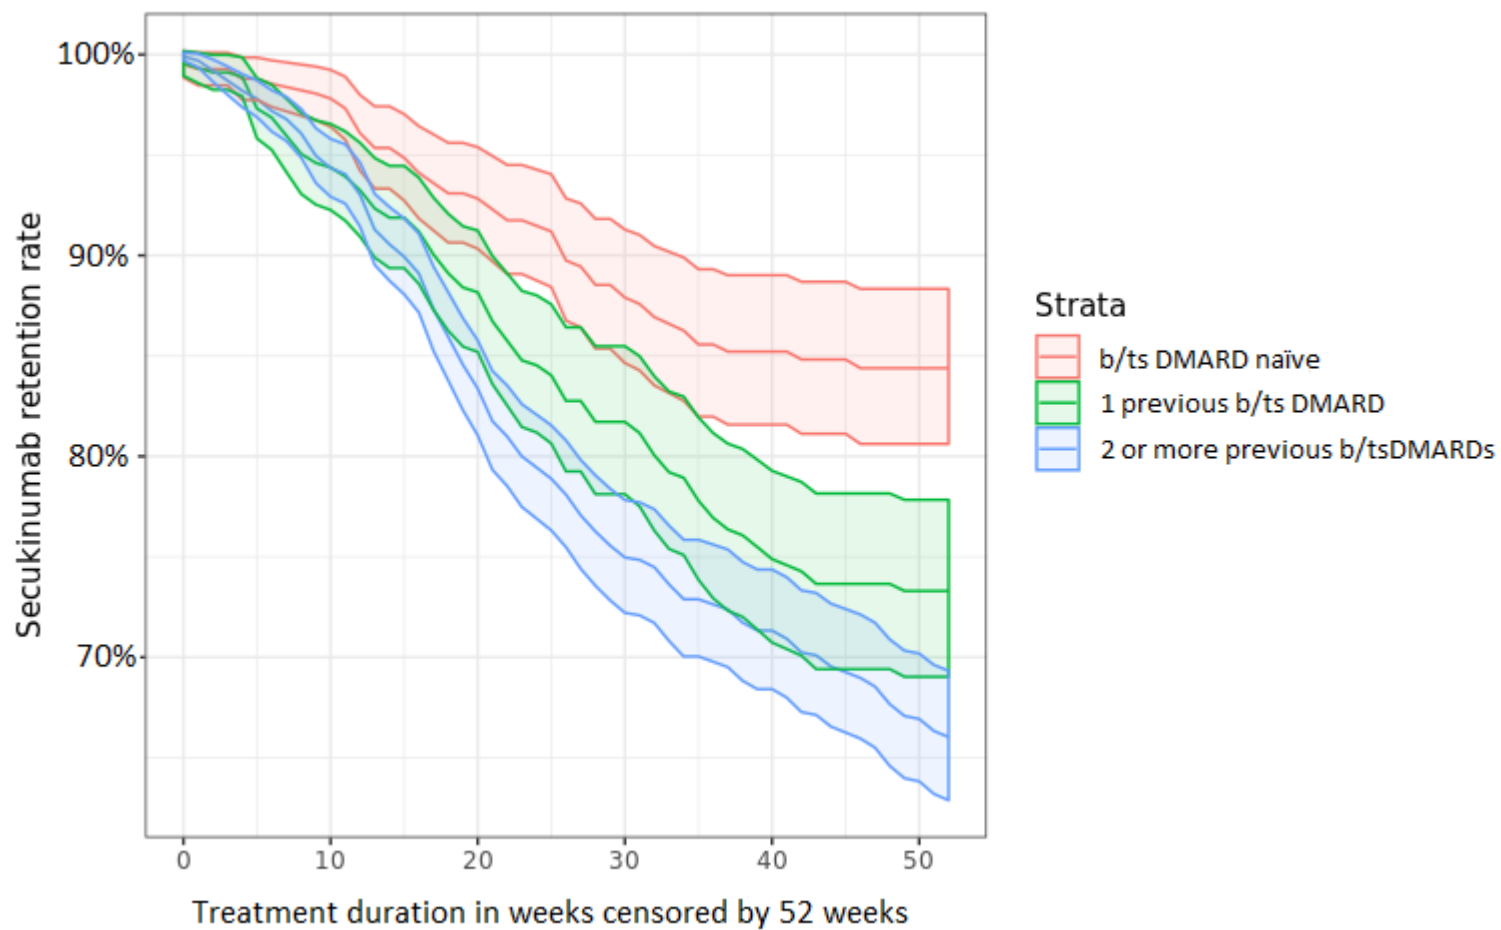

Supplement: inline-supplementary-material-1 [file inline-supplementary-material-1.pdf]
